# Supplementary material for: HTLV-1 bZIP Factor-Induced Reprogramming of Lactate Metabolism and Epigenetic Status Promote Leukemic Cell Expansion
Source: PubMed Central journal article supplement — Blood Cancer Discov. 2023 May 9;4(5):374–93. doi: 10.1158/2643-3230.BCD-22-0139 (PMC10473166; doi:10.1158/2643-3230.bcd-22-0139), 2023-05-09
Supplement: bcd-22-0139_figure_s1_suppsf1.pdf [file bcd-22-0139_figure_s1_suppsf1.pdf]

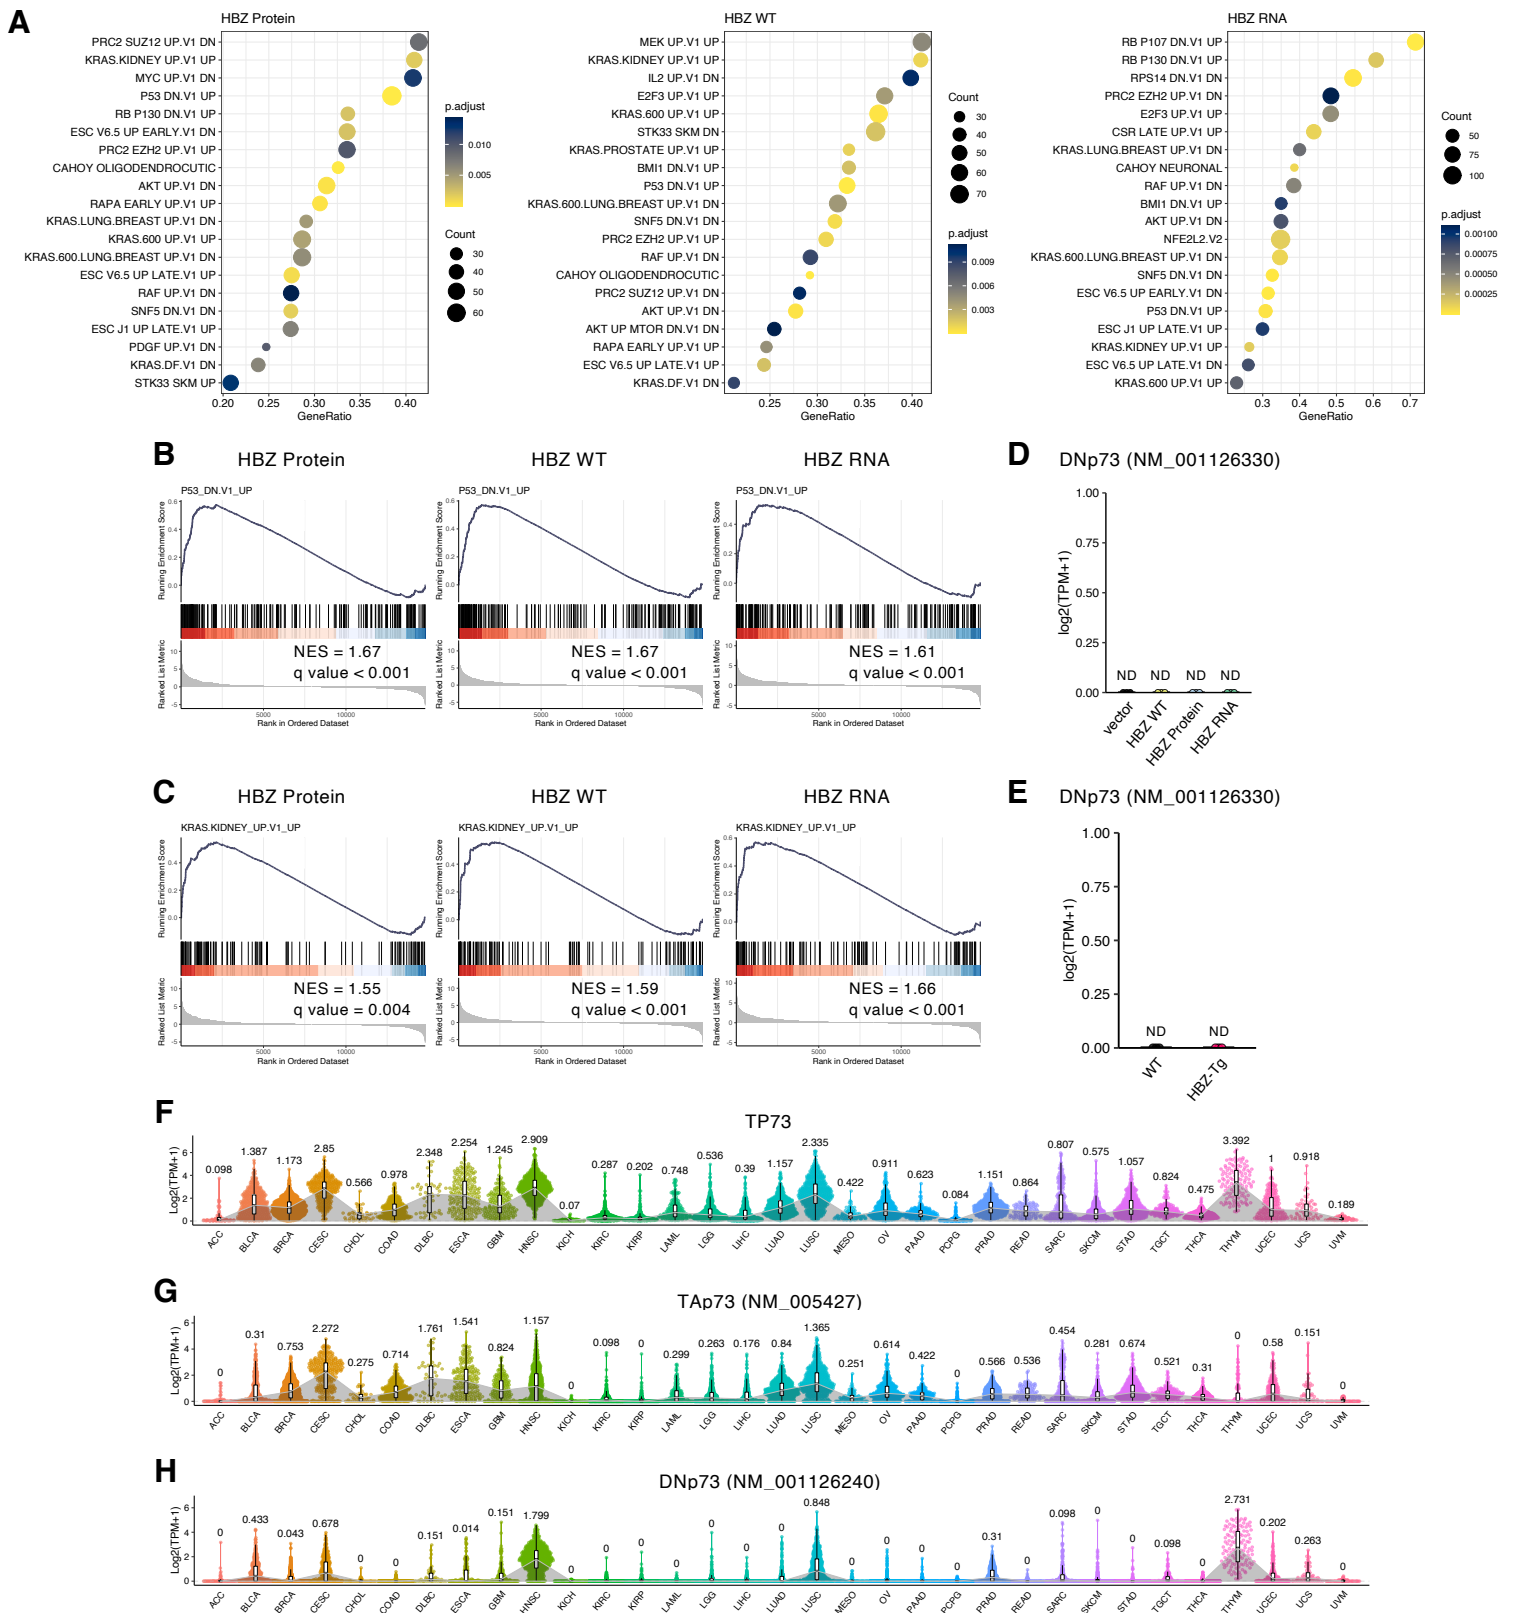

### Supplementary Figure S1. Transcriptional regulation by HBZ protein and RNA and the status of TP73 expression.

(A) Dot plots of GSEA results among HBZ-transduced murine CD4<sup>+</sup> T cells. Statistical values and gene counts determined by the clusterProfiler are shown.

(B and C) Representative GSEA plots, P53\_DN.V1\_UP (B) and KRAS.KIDNEY\_UP.V1\_UP (C) for cells transduced with HBZ compared to the vector. The normalized enrichment scores (NES) and q-values are listed.

(D and E) Transcripts per million (TPM) of DNP73 in HBZ-transduced murine CD4<sup>+</sup> T cells (D); and in wild-type (WT) and HBZ-Tg mice (E). ND, not detectable.

(F-H) TPMs of TP73 (F), TAp73 (G) and DNP73 (H) in TCGA data. Tumor type abbreviations are found in the Methods.
